# Supplementary material for: C‐C Chemokine Receptor Type 5 (CCR5)‐Mediated Docking of Transferred Tregs Protects Against Early Blood‐Brain Barrier Disruption After Stroke
Source: PubMed Central journal article supplement — J Am Heart Assoc. 2017 Aug 2;6(8):e006387. doi: 10.1161/JAHA.117.006387 (PMC5586468; doi:10.1161/jaha.117.006387), 2017-08-02
Supplement: JAH3-6-e006387-s001.pdf [file JAH3-6-e006387-s001.pdf]

# **SUPPLEMENTAL MATERIAL**

**Table S1. Primers for RT-PCR**

|        |         |                           |
|--------|---------|---------------------------|
| CTLA-4 | Forward | GGTTTTACTCTGCTCCCTGAGGACC |
|        | Reverse | ATCCCAGCTCTCTGTTCATGCTCC  |
| Foxp3  | Forward | TACTCGCATGTTTCGCCTACTTC   |
|        | Reverse | AGGGATTGGAGCACTTGTTG      |
| PD-L1  | Forward | CTCGCCTGCAGATAGTTCCC      |
|        | Reverse | TAAACGCCCGTAGCAAGTGA      |
| CD39   | Forward | GGACTGACCCAGAACAAACC      |
|        | Reverse | AGGTACGCACCGATTTTCATC     |
| IL10   | Forward | CAGAGCCACATGCTCCTAGA      |
|        | Reverse | TGTCCAGCTGGTCCTTTGTT      |
| CCL3   | Forward | CCATATGGAGCTGACACCCC      |
|        | Reverse | TCAGGAAAATGACACCTGGCT     |
| CCL4   | Forward | TTTCTTTACACCTCCCGGC       |
|        | Reverse | TTTTGGTCAGGAATACCACAGC    |
| CCL5   | Forward | TGCCACGTCAAGGAGTATTT      |
|        | Reverse | CCCCTTCTTCTCTGGGTTGG      |

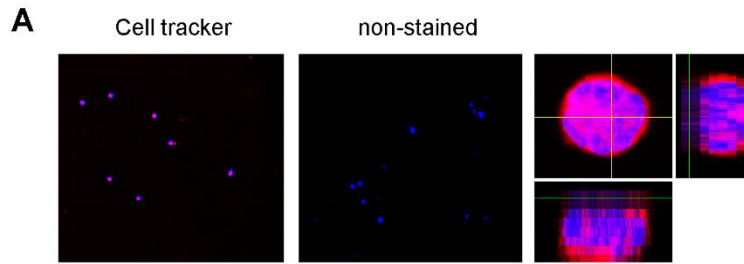

**Figure S1. Treg labeling for two-photon in vivo imaging.** (A) Tregs were isolated from spleens and lymph nodes of donor mice and incubated with CellTracker™ Deep Red Dye (Invitrogen) at a concentration of 20  $\mu$ M at 37°C for 30 minutes. Representative images were obtained from confocal microscopy.

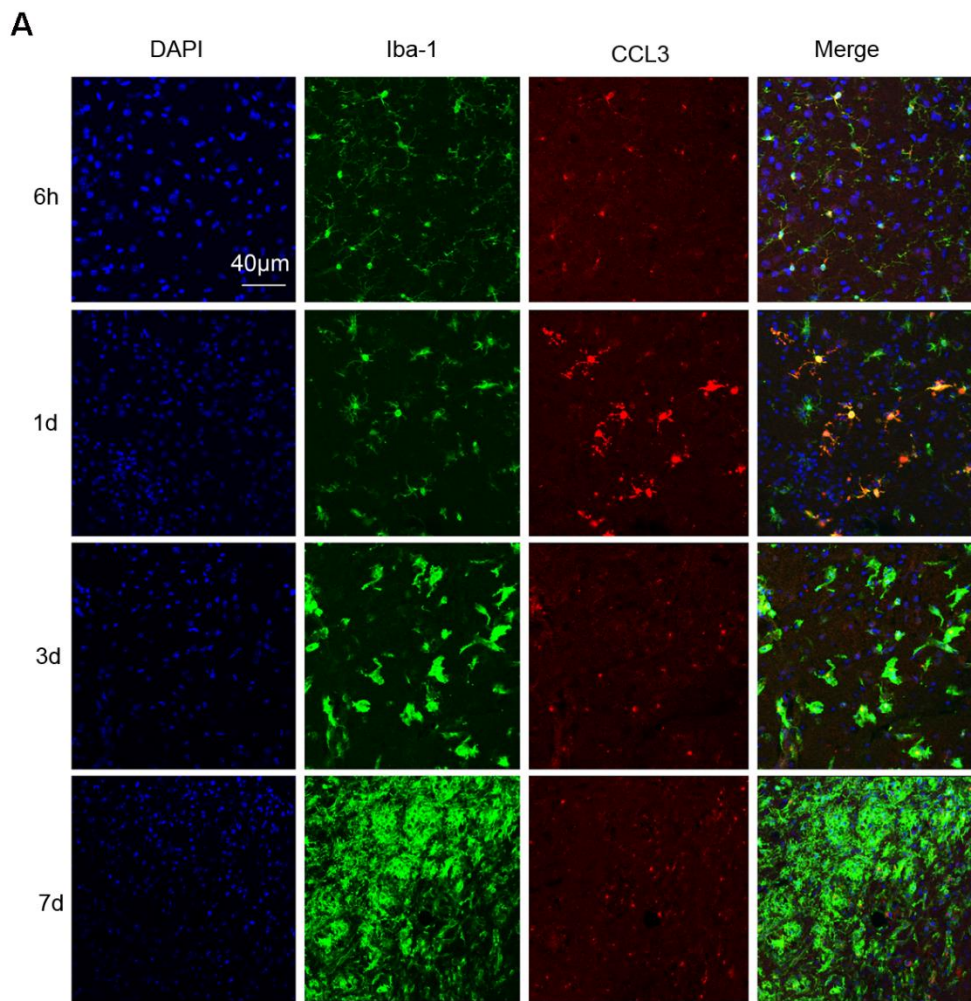

**Figure S2. CCL3 expression in the ischemic brain at different time points after MCAO.** Cerebral ischemia was induced in WT mice by 60 minutes tMCAO. Animals were euthanized at 6 hours, 1 day, 3 days and 7 days after reperfusion. Immunofluorescence staining shows that CCL3 expression was markedly increased at 1 day after MCAO and its expression was co-localized with Iba-1, a microglial cell marker. Expression of CCL3 in the ischemic brain was diminished 3 days after stroke. Images are representative of 3-5 independent animals.
